# Supplementary material for: Correction to “Development of Cytotoxic GW7604-Zeise’s Salt Conjugates as Multitarget Compounds with Selectivity for Estrogen Receptor-Positive Tumor Cells”
Source: PubMed Central journal article supplement (PMC11089497; doi:10.1021/acs.jmedchem.4c00799), 2024-04-23
Supplement: jm4c00799_si_001.pdf [file jm4c00799_si_001.pdf]

Supporting Information for:

# Development of Cytotoxic GW7604-Zeise's Salt Conjugates as Multitarget Compounds with Selectivity for Estrogen Receptor-Positive Tumor Cells

Patricia Grabher,<sup>†</sup> Paul Kapitza,<sup>\*,†</sup> Nikolas Hörmann,<sup>†</sup> Amelie Scherfler,<sup>†</sup> Martin Hermann,<sup>#</sup> Michael Zwerger,<sup>§</sup> Hristo P. Varbanov,<sup>†</sup> Brigitte Kircher,<sup>‡,¶</sup> Daniel Baecker,<sup>\*,<sup>i</sup></sup> and Ronald Gust<sup>\*,†</sup>

<sup>†</sup> Department of Pharmaceutical Chemistry, Institute of Pharmacy, Center for Molecular Biosciences Innsbruck, University of Innsbruck, Innrain 80/82, A-6020 Innsbruck.

<sup>#</sup> Department of Anesthesiology & Critical Care Medicine, Medical University Innsbruck, Anichstrasse 35, A-6020 Innsbruck.

<sup>§</sup> Department of Pharmacognosy, Institute of Pharmacy, Center for Molecular Biosciences Innsbruck, University of Innsbruck, Innrain 80/82, A-6020 Innsbruck.

<sup>‡</sup> Department of Internal Medicine V, Haematology & Oncology, Immunobiology and Stem Cell Laboratory, Medical University Innsbruck, Anichstrasse 35, A-6020 Innsbruck.

<sup>¶</sup> Tyrolean Cancer Research Institute, Innrain 66, A-6020 Innsbruck.

<sup>i</sup> Department of Pharmaceutical and Medicinal Chemistry, Institute of Pharmacy, Freie Universität Berlin, Königin-Luise-Straße 2+4, D-14195 Berlin.

## Corresponding Authors:

Paul Kapitza ([paul.kapitza@uibk.ac.at](mailto:paul.kapitza@uibk.ac.at))

Daniel Baecker ([d.baecker@fu-berlin.de](mailto:d.baecker@fu-berlin.de))

Ronald Gust ([gust.ronald@gmail.com](mailto:gust.ronald@gmail.com))

## TABLE OF CONTENTS

---

|                                                                                                                                                                                                                   |     |
|-------------------------------------------------------------------------------------------------------------------------------------------------------------------------------------------------------------------|-----|
| 1. <sup>1</sup> H, <sup>13</sup> C, <sup>1</sup> H/ <sup>1</sup> H COSY, and <sup>1</sup> H/ <sup>13</sup> C HSQC NMR Spectra of the GW7604-Alk-PtCl <sub>3</sub> Complexes ....                                  | S2  |
| 2. Conformational description of GW7604-But-PtCl <sub>3</sub> Isomers .....                                                                                                                                       | S10 |
| 3. NMR Spectra from Stability Studies in Organic Solvents .....                                                                                                                                                   | S11 |
| 4. HPLC Chromatograms of the GW7604-Alk-PtCl <sub>3</sub> Complexes .....                                                                                                                                         | S14 |
| 5. MS spectrum of the methanolic extract from DMEM incubated with GW7604-Pent-PtCl <sub>3</sub> and the calculated isotopic distribution pattern for [GW7604-Pent-Pt(Ala)(CH <sub>3</sub> OH)] <sup>+</sup> ..... | S15 |
| 6. Additional ESI-HR-MS Data from Reactivity Studies Towards 5'-Guanosin Monophosphate                                                                                                                            | S16 |
| 7. Additional Biological Data for TSA-201 and MCF-7 Cells .....                                                                                                                                                   | S16 |

1.  $^1\text{H}$ ,  $^{13}\text{C}$ ,  $^1\text{H}/^1\text{H}$  COSY, AND  $^1\text{H}/^{13}\text{C}$  HSQC NMR SPECTRA OF THE GW7604-ALK-PTCL<sub>3</sub> COMPLEXES

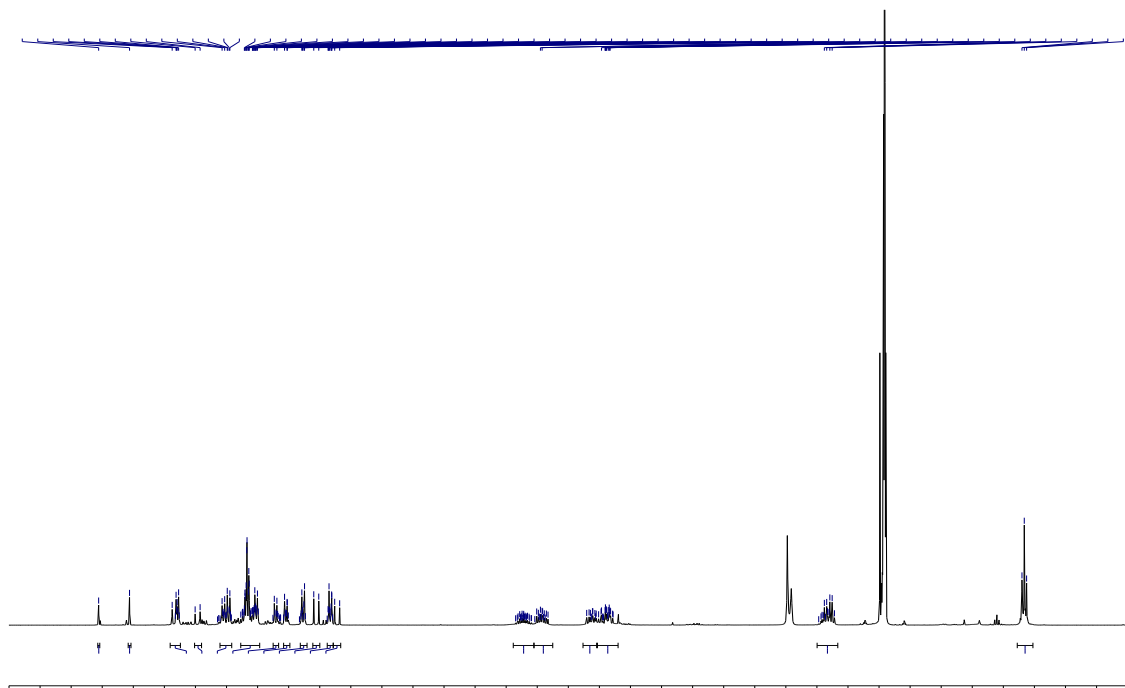

Figure S1.  $^1\text{H}$  NMR (400 MHz) of GW7604-Prop-PtCl<sub>3</sub> in acetone-*d*<sub>6</sub>

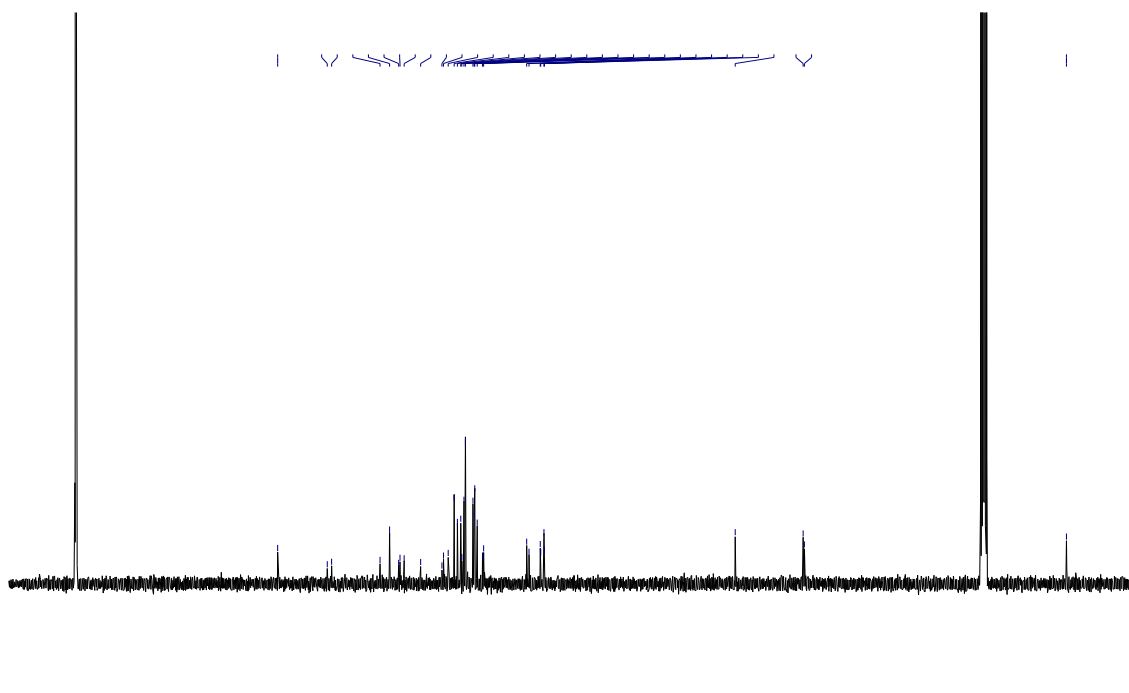

Figure S2.  $^{13}\text{C}$  NMR (101 MHz) of GW7604-Prop-PtCl<sub>3</sub> in acetone-*d*<sub>6</sub>.

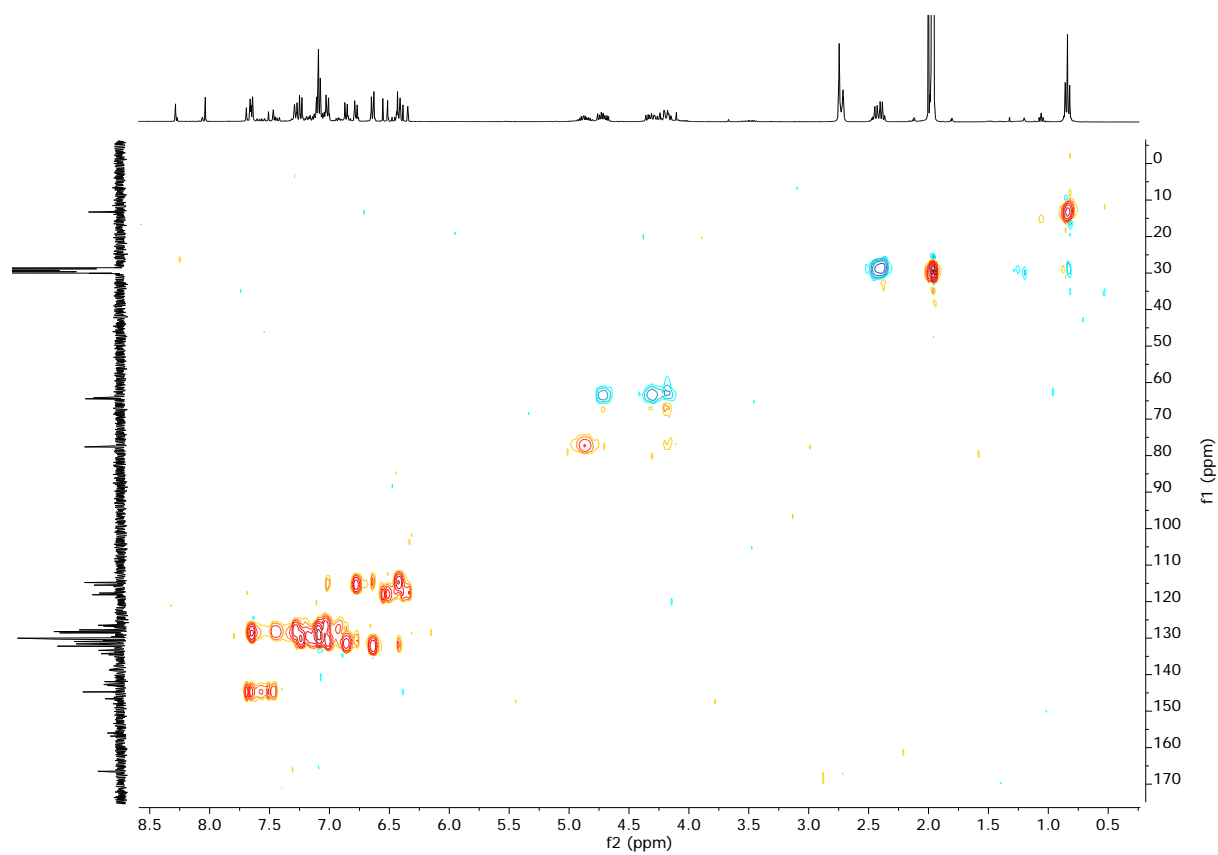

Figure S3.  $^1\text{H}/^{13}\text{C}$  HSQC of GW7604-Prop-PtCl<sub>3</sub> in acetone-*d*<sub>6</sub>

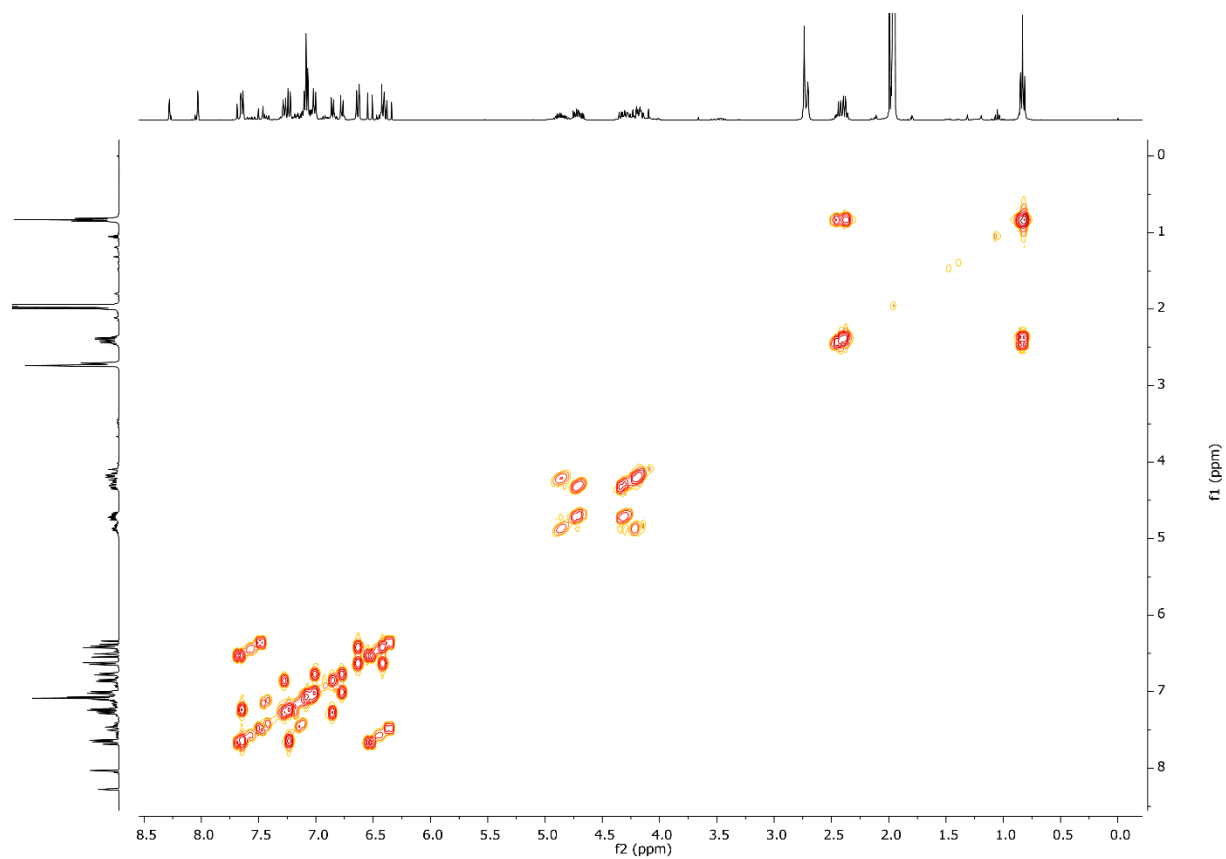

Figure S4.  $^1\text{H}$  COSY of GW7604-Prop-PtCl<sub>3</sub> in acetone-*d*<sub>6</sub>.

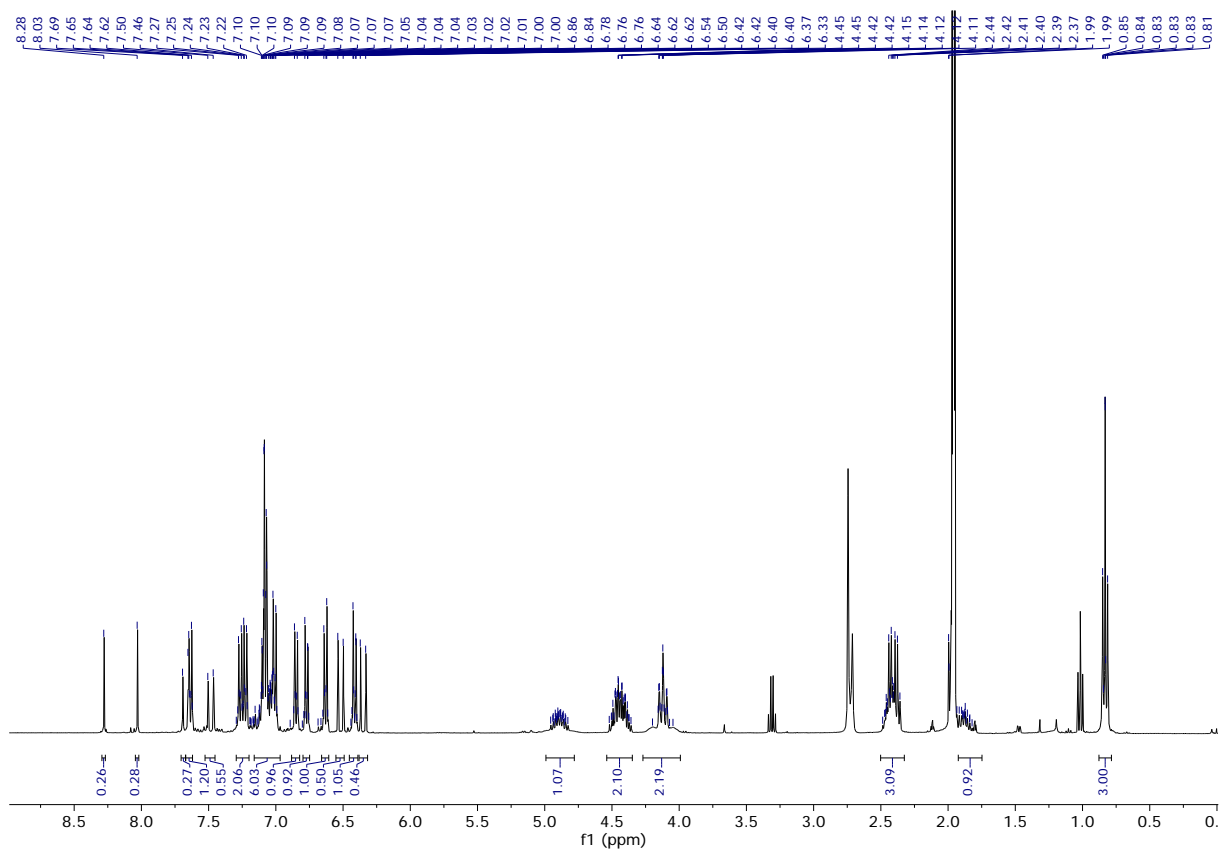

Figure S5.  $^1\text{H}$  NMR (400 MHz) of the GW7604-But- $\text{PtCl}_3$  in acetone- $d_6$ .

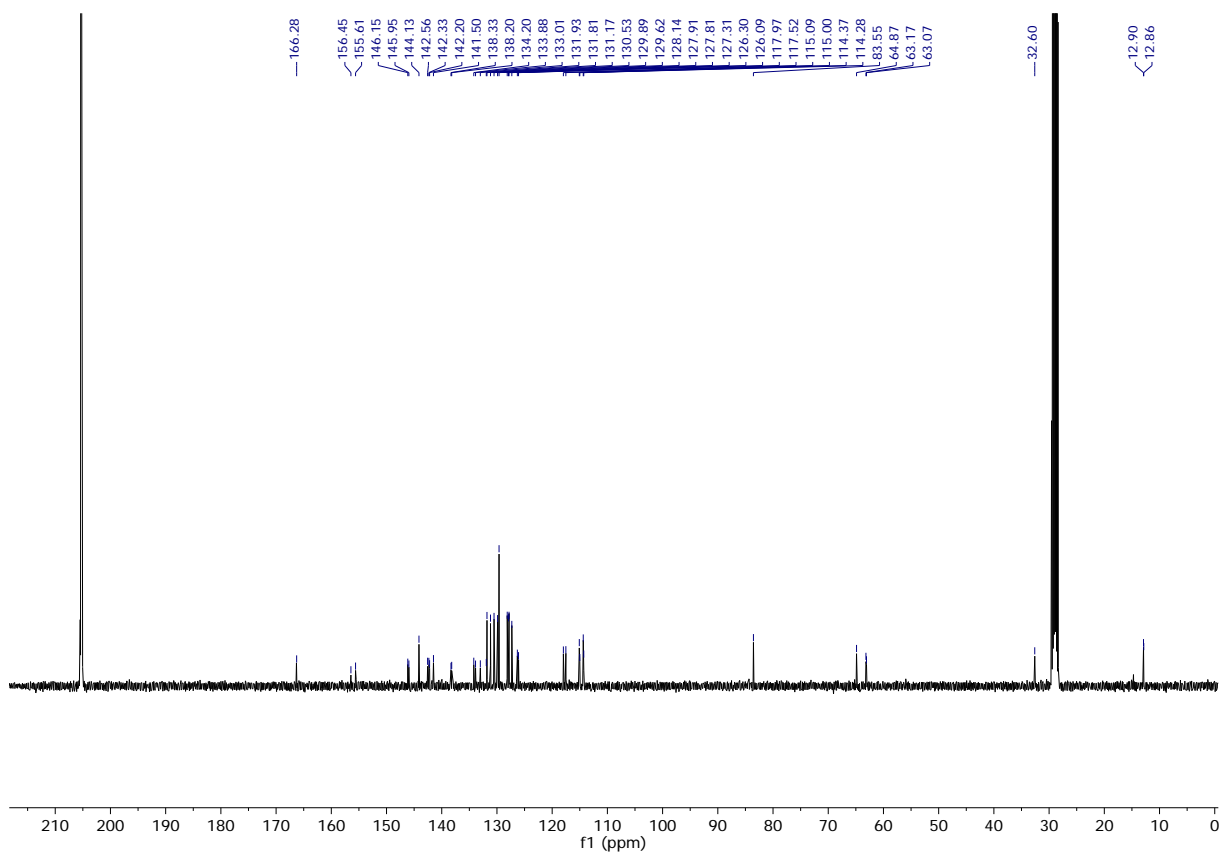

Figure S6.  $^{13}\text{C}$  NMR (101 MHz) of GW7604-But- $\text{PtCl}_3$  in acetone- $d_6$ .

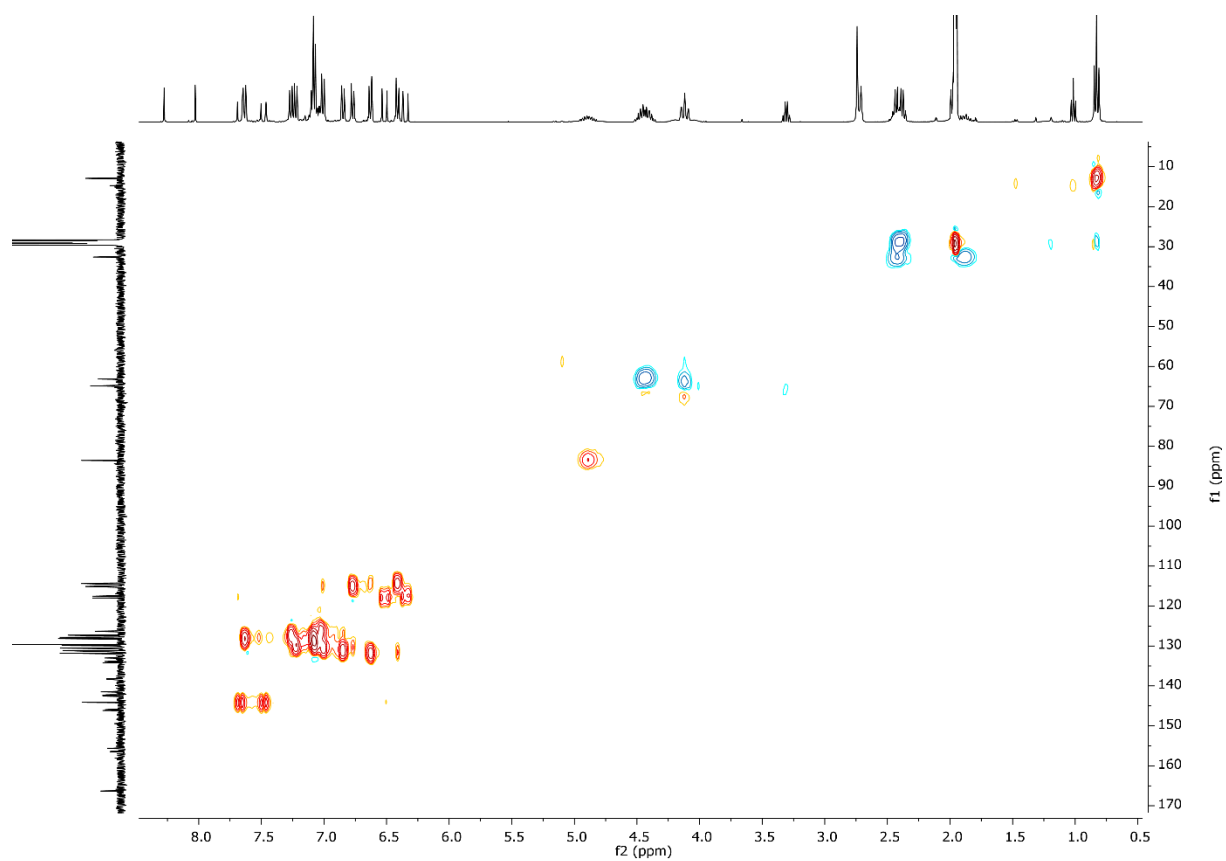

Figure S7.  $^1\text{H}/^{13}\text{C}$  HSQC of GW7604-But-PtCl<sub>3</sub> in acetone-*d*<sub>6</sub>.

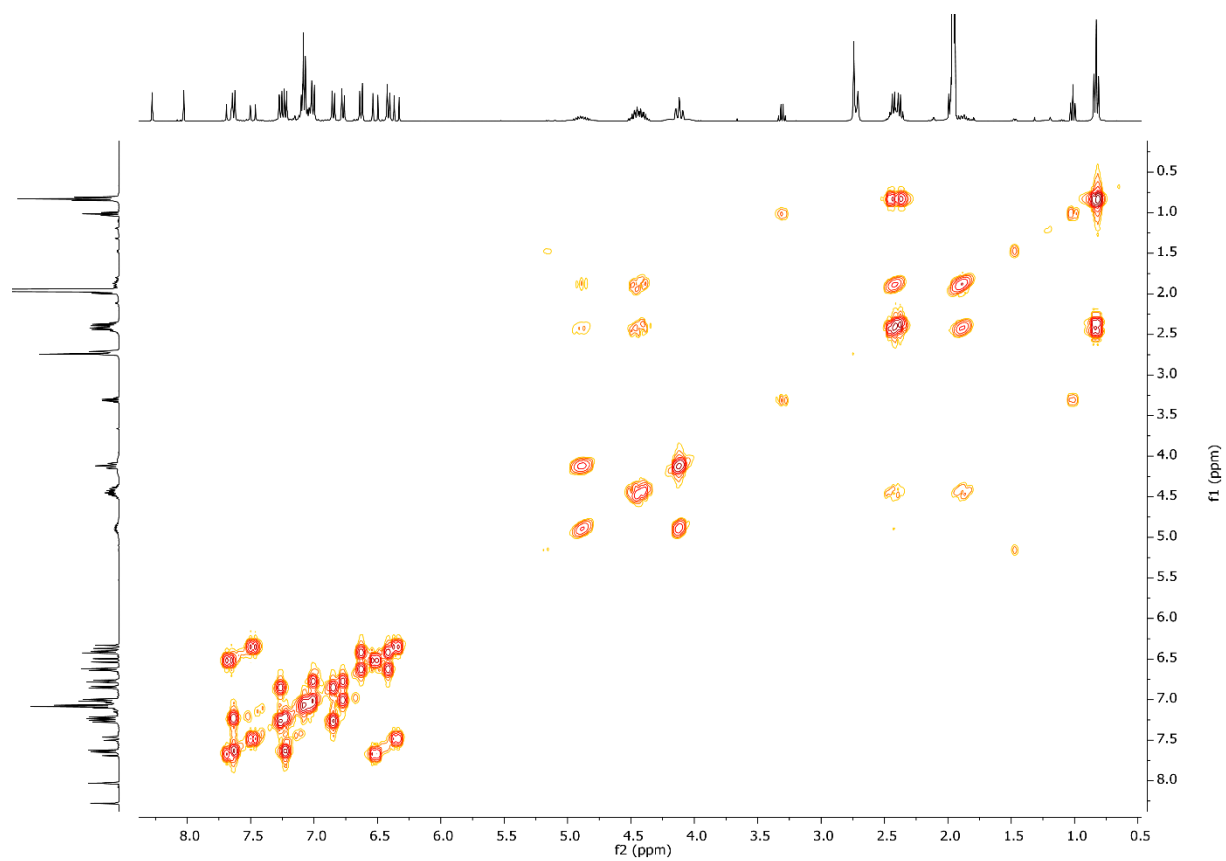

Figure S8.  $^1\text{H}$  COSY of GW7604-But-PtCl<sub>3</sub> in acetone-*d*<sub>6</sub>.

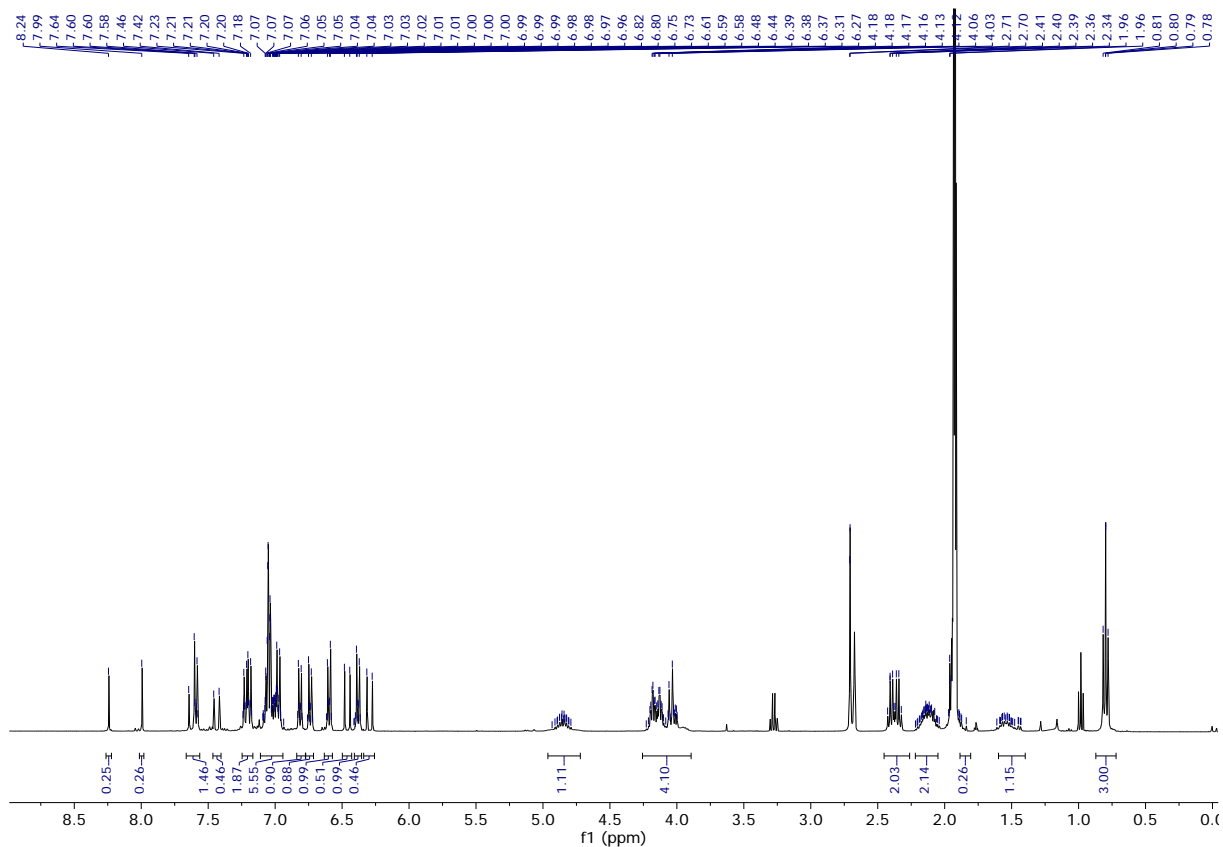

Figure S9.  $^1\text{H}$  NMR (400 MHz) of GW7604-Pent-PtCl<sub>3</sub> in acetone-*d*<sub>6</sub>.

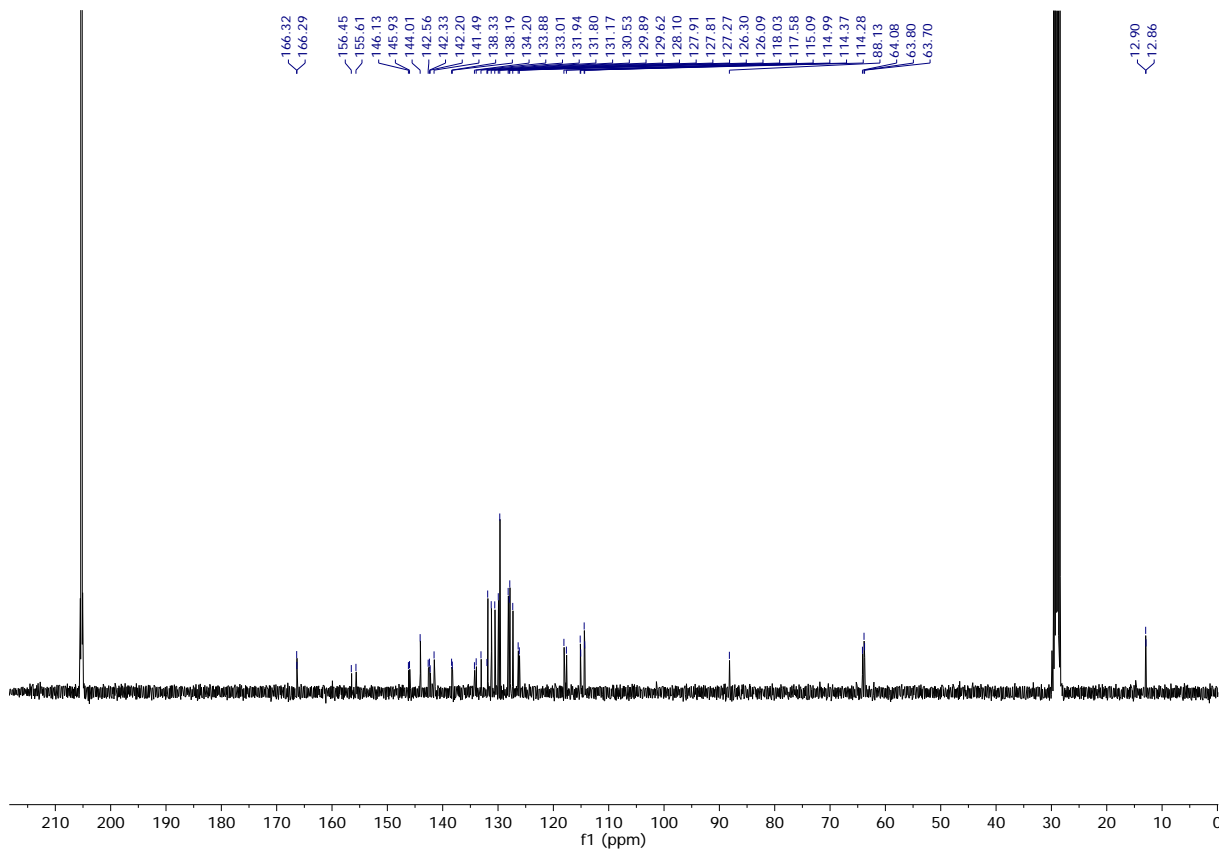

Figure S10.  $^{13}\text{C}$  NMR (101 MHz) of GW7604-Pent-PtCl<sub>3</sub> in acetone-*d*<sub>6</sub>.

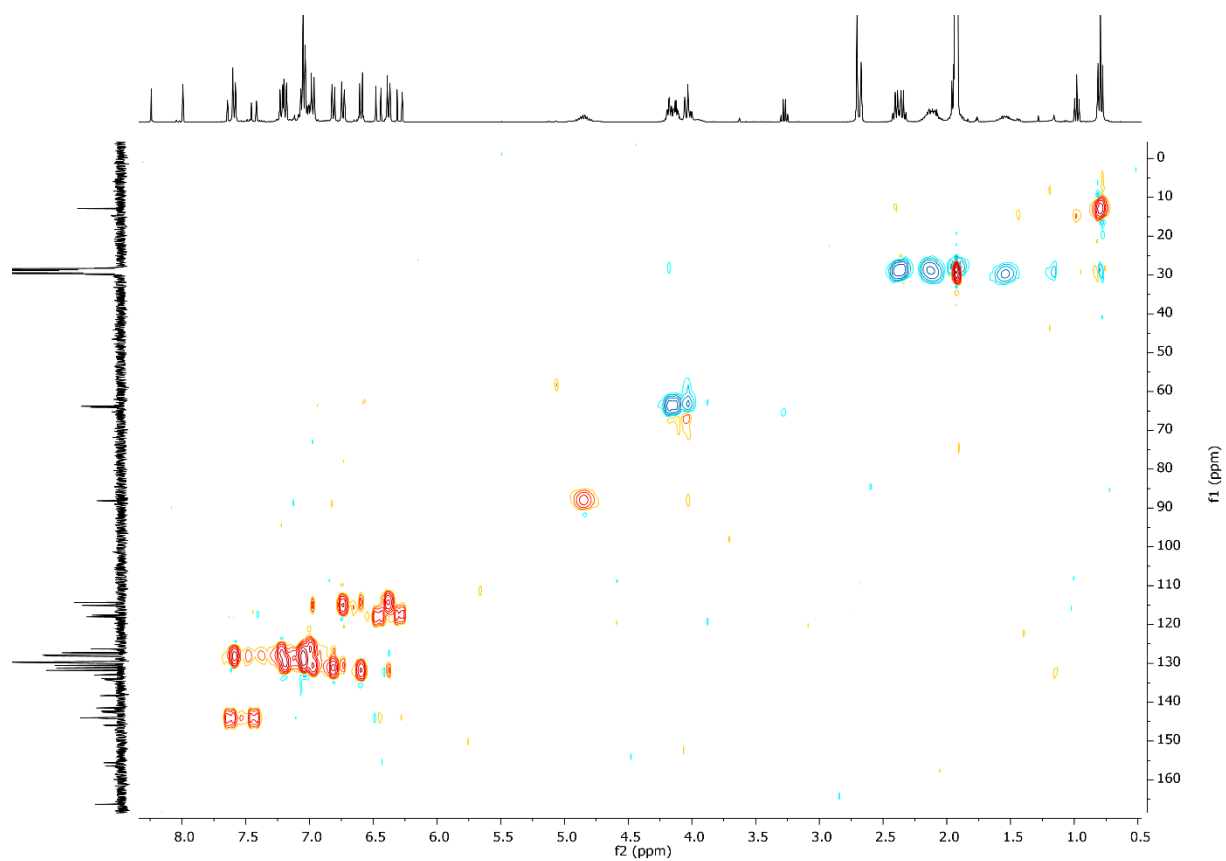

**Figure S11.**  $^1\text{H}/^{13}\text{C}$  HSQC of the GW7604-Pent-PtCl<sub>3</sub> in acetone-*d*<sub>6</sub>.

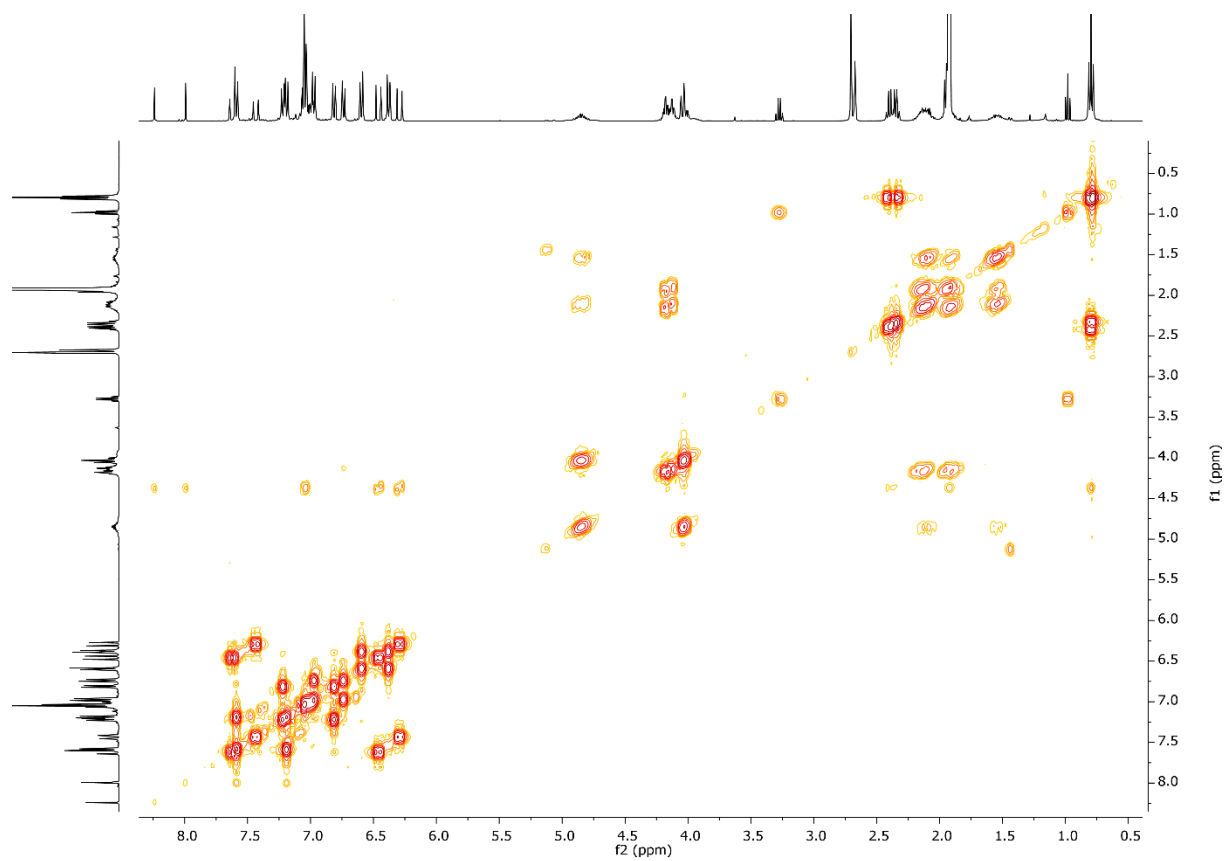

**Figure S12.**  $^1\text{H}$  COSY of the GW7604-Pent-PtCl<sub>3</sub> in acetone-*d*<sub>6</sub>.

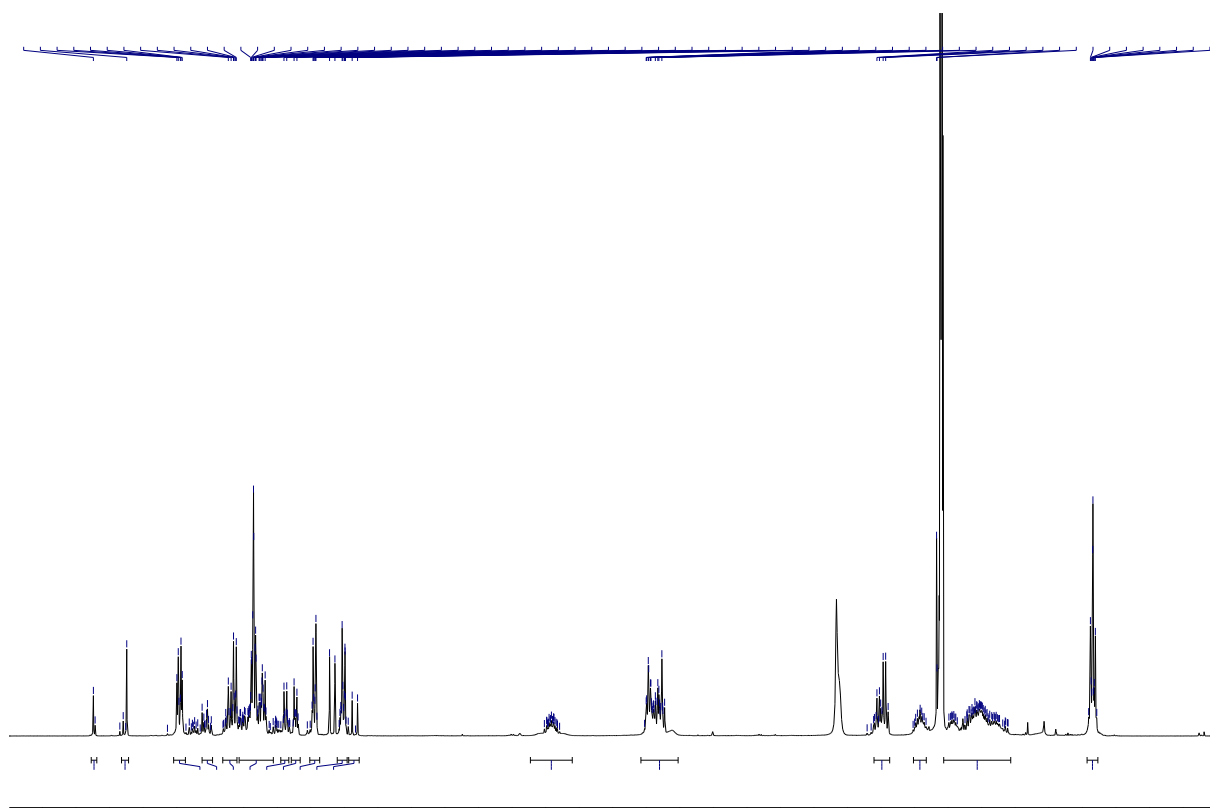

**Figure S13.**  $^1\text{H}$  NMR (400 MHz) of GW7604-Hex-PtCl<sub>3</sub> in acetone-*d*<sub>6</sub>.

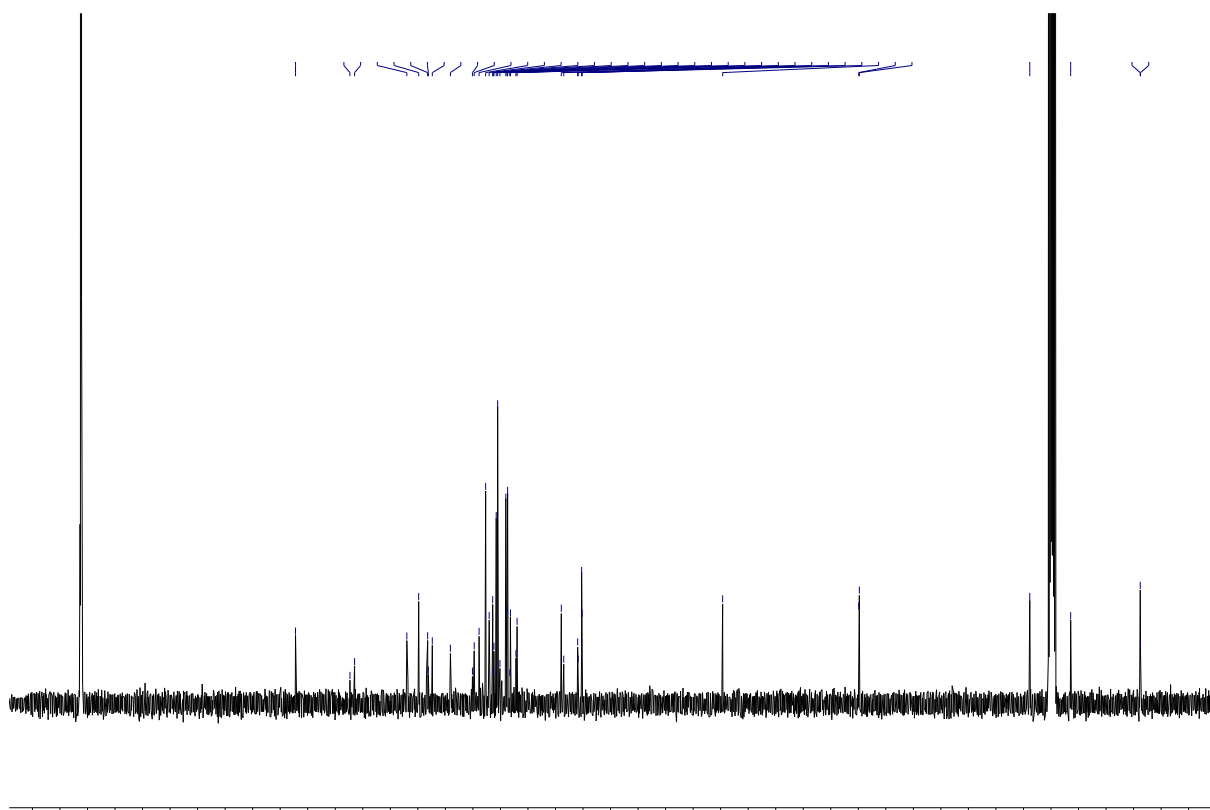

**Figure S14.**  $^{13}\text{C}$  NMR (101 MHz) of GW7604-Hex-PtCl<sub>3</sub> in acetone-*d*<sub>6</sub>.



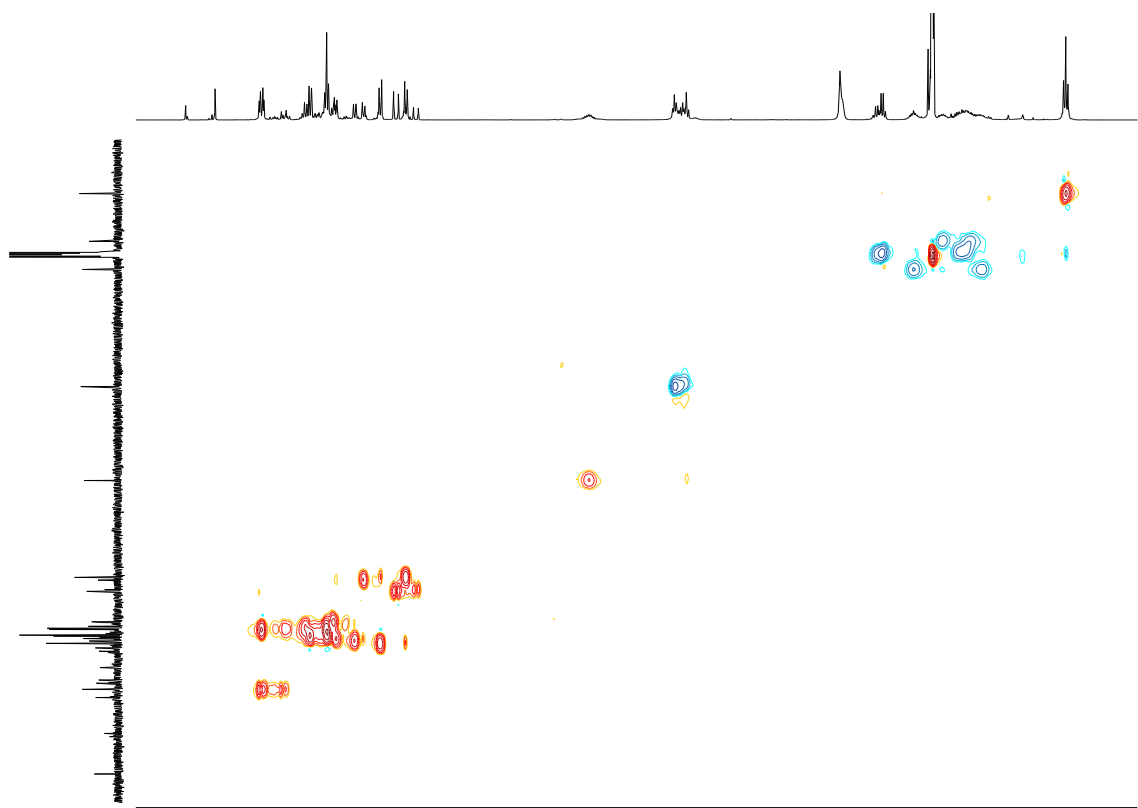

Figure S15.  $^1\text{H}/^{13}\text{C}$  HSQC of GW7604-Hex-PtCl<sub>3</sub> in acetone-*d*<sub>6</sub>.

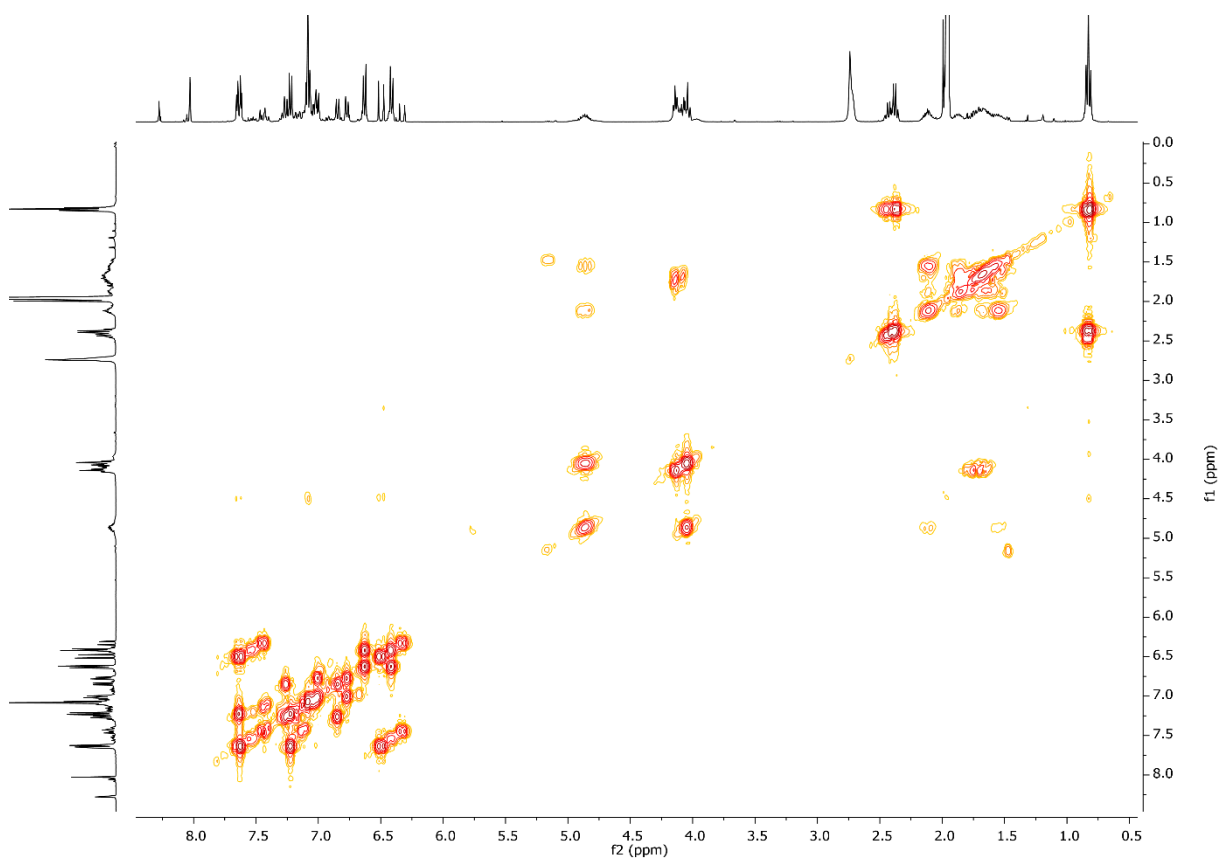

Figure S16.  $^1\text{H}$  COSY of GW7604-Hex-PtCl<sub>3</sub> in acetone-*d*<sub>6</sub>.

## 2. CONFORMATIONAL DESCRIPTION OF GW7604-BUT-PTCl<sub>3</sub> ISOMERS

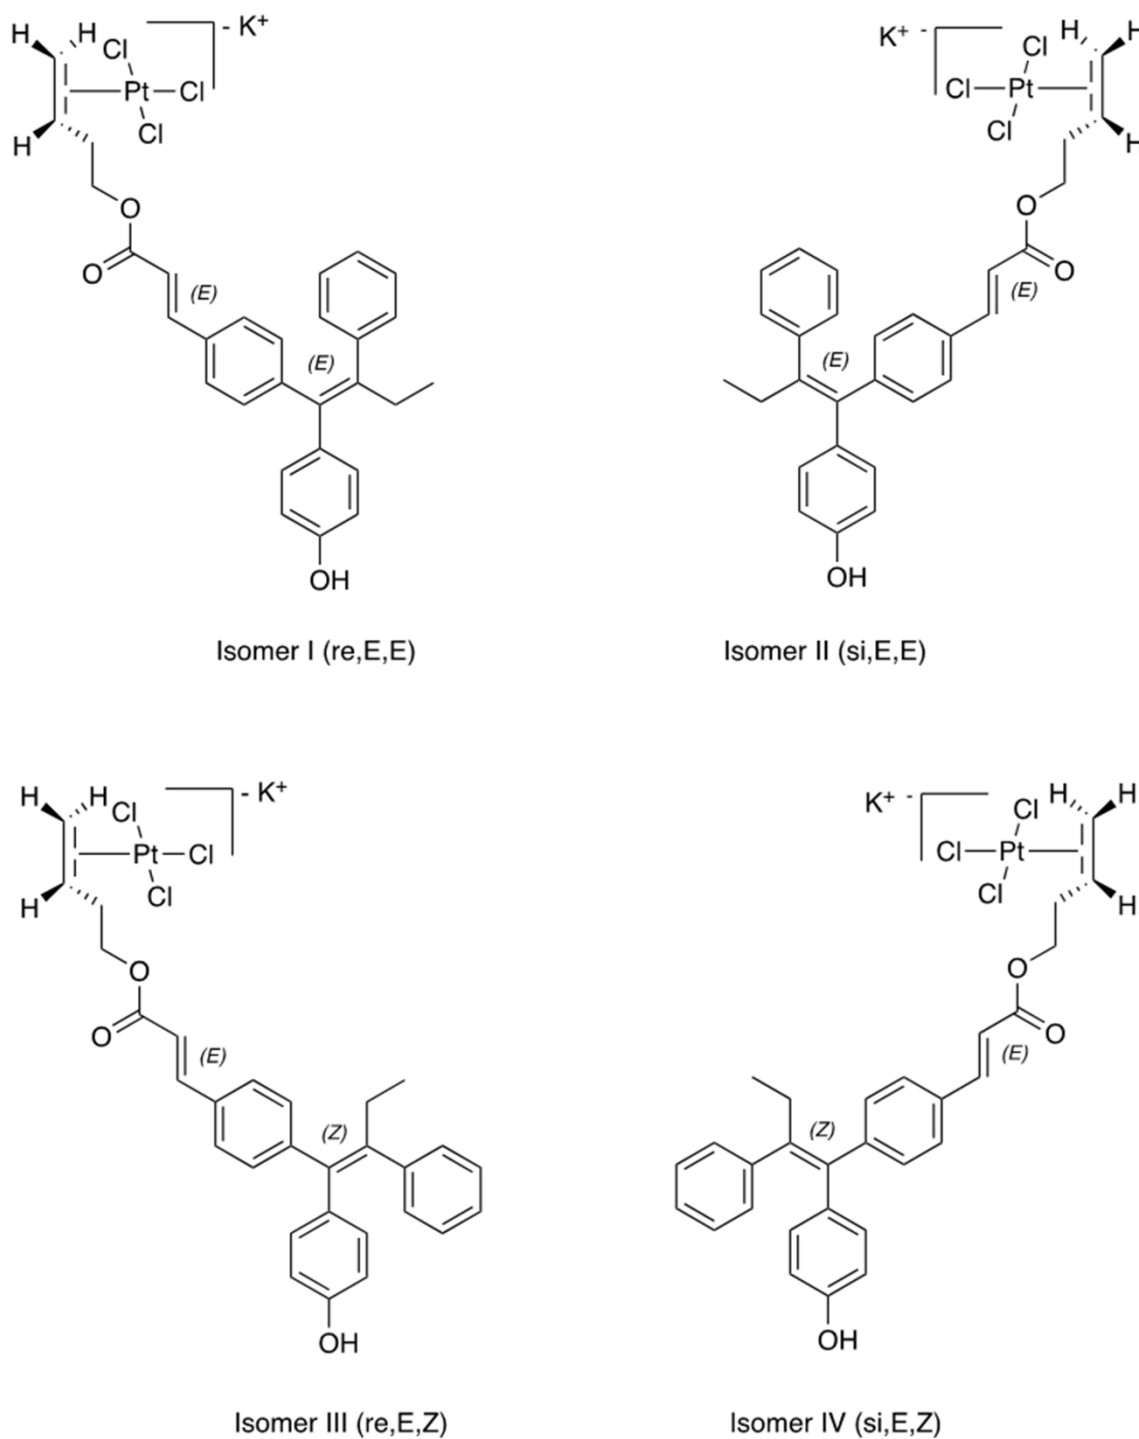

**Figure S17.** Conformational description of **GW7604-But-PtCl<sub>3</sub>** isomers I and II as well as isomers III and IV are enantiomers. The enantiomeric pairs I/II and III/IV are diastereomeric to each other. They cause for instance two sets of Signals in the <sup>1</sup>H NMR spectrum (Figure 1).

### 3. NMR SPECTRA FROM STABILITY STUDIES IN ORGANIC SOLVENTS

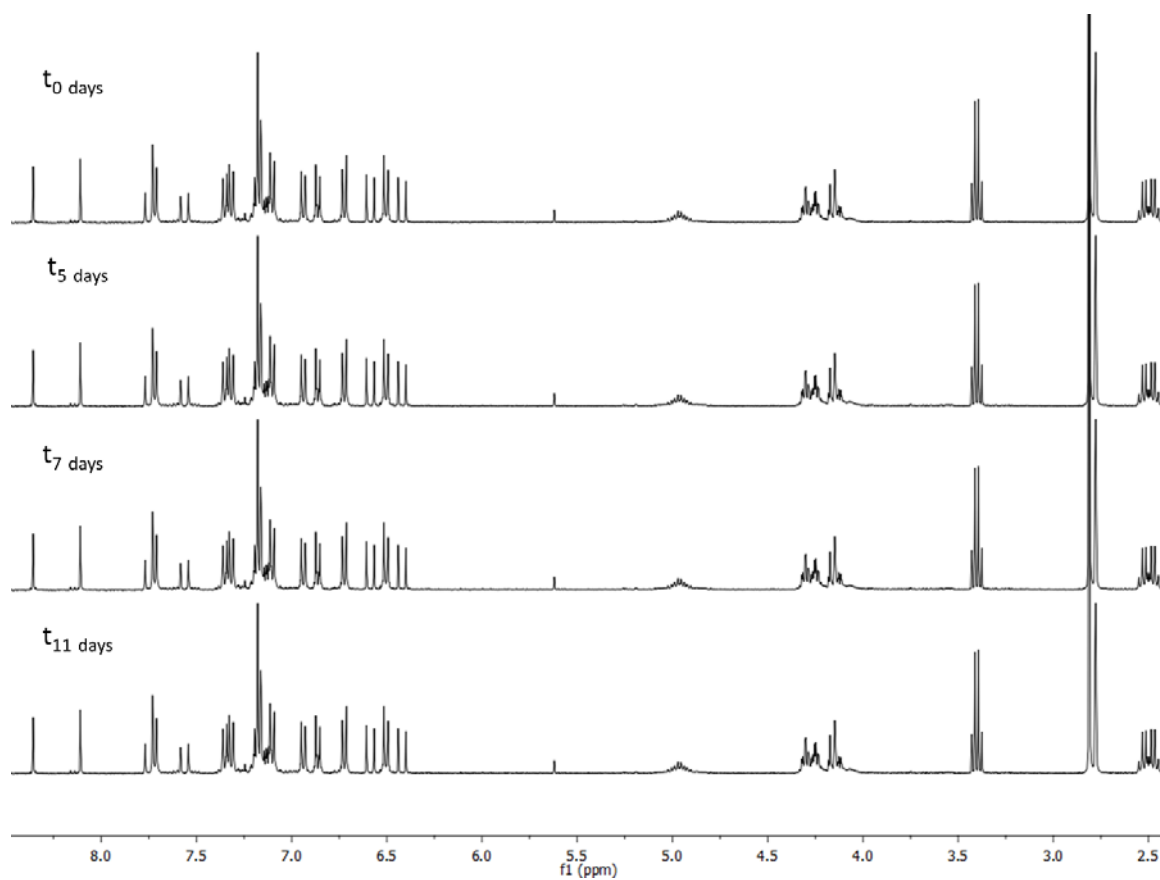

Figure S18.  $^1\text{H}$  NMR (400 MHz) of GW7604-Pent-PtCl<sub>3</sub> in acetone-*d*<sub>6</sub>.

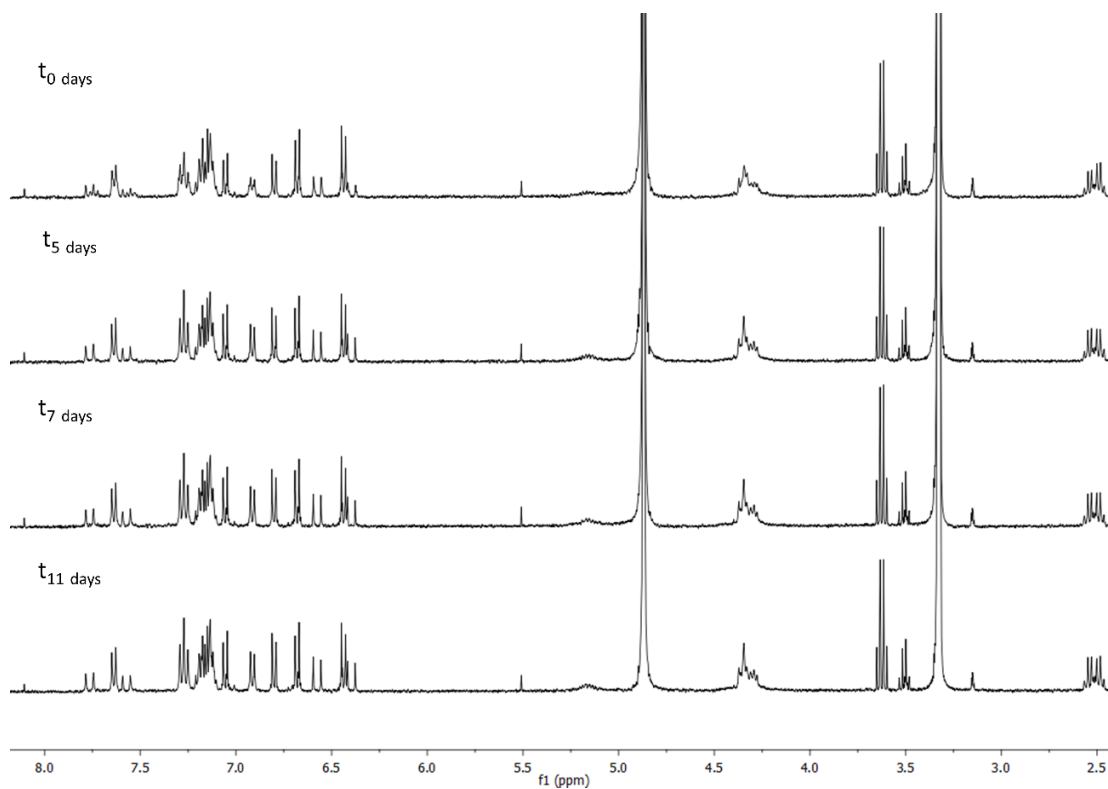

Figure S19.  $^1\text{H}$  NMR (400 MHz) of GW7604-Pent-PtCl<sub>3</sub> in methanol-*d*<sub>4</sub>.

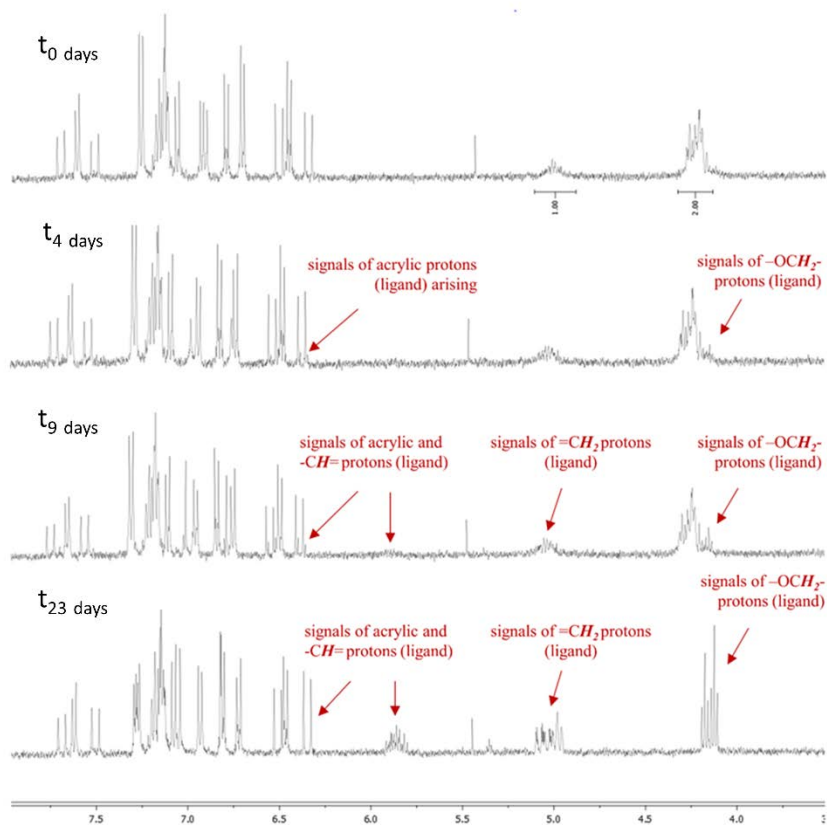

Figure S20.  $^1\text{H}$  NMR (400 MHz) of GW7604-Pent-PtCl<sub>3</sub> in acetonitrile-*d*<sub>3</sub>.

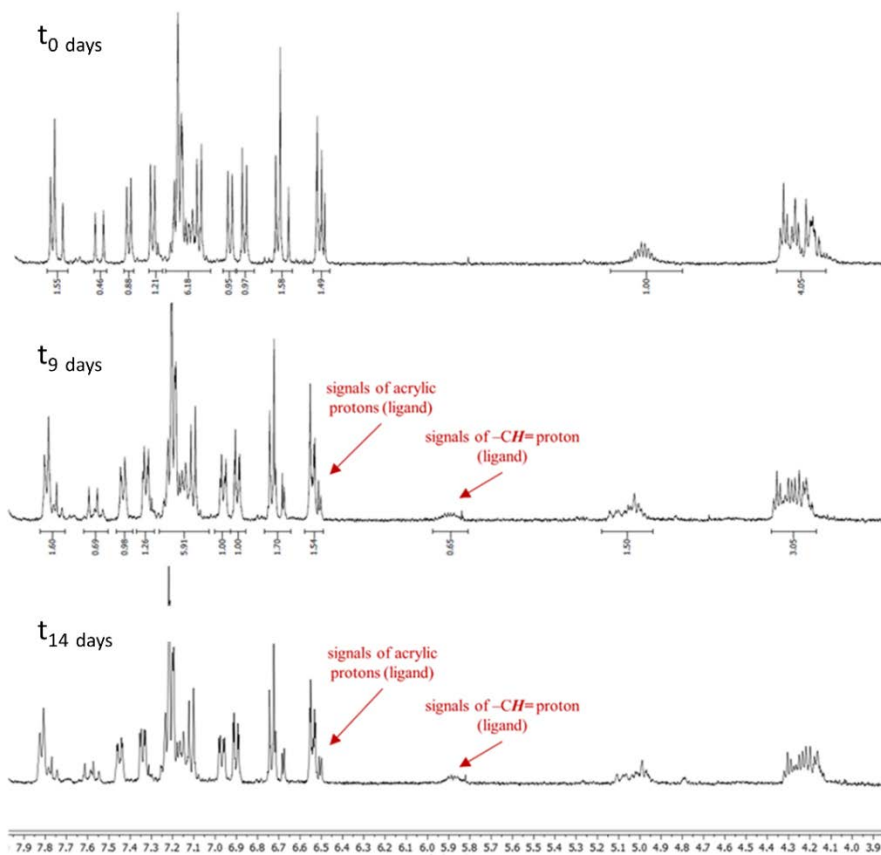

Figure S21.  $^1\text{H}$  NMR (400 MHz) of GW7604-Pent-PtCl<sub>3</sub> in DMF-*d*<sub>7</sub>.

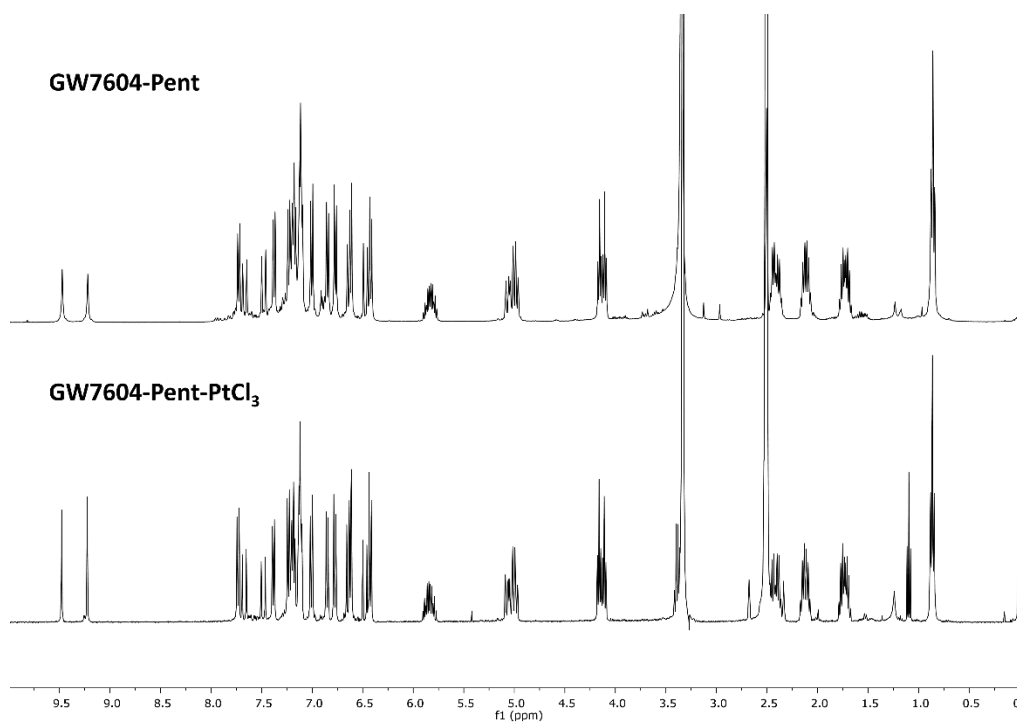

**Figure S22.**  $^1\text{H}$  NMR spectra (400 MHz) of **GW7604-Pent** and **GW7604-Pent-PtCl<sub>3</sub>** recorded in  $\text{DMSO-}d_6$  after 5 min of incubation at rt. The spectrum of **GW7604-Pent-PtCl<sub>3</sub>** contains traces of diethyl ether.

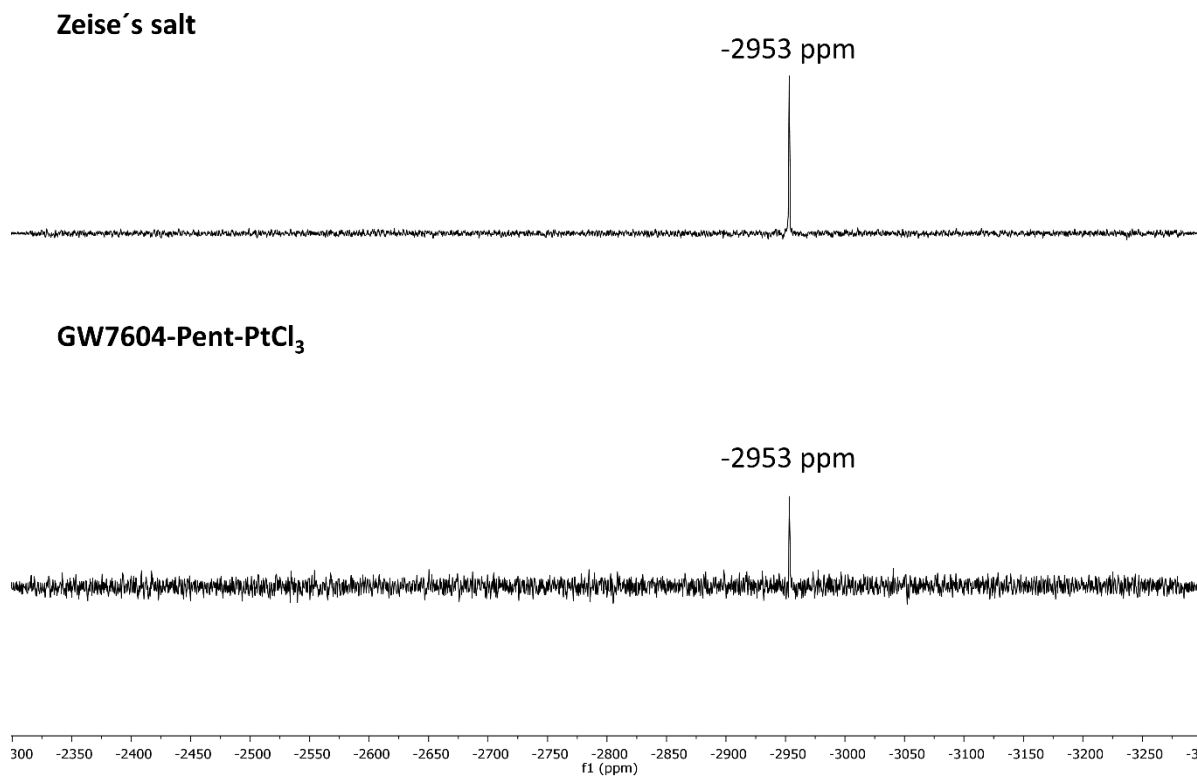

**Figure S23.**  $^{195}\text{Pt}$  NMR spectra (86 MHz) of **Zeise's salt** and **GW7604-Pent-PtCl<sub>3</sub>** recorded in  $\text{DMSO-}d_6$  after 24 h of incubation at rt.

#### 4. HPLC CHROMATOGRAMS OF THE GW7604-ALK-PtCl<sub>3</sub> COMPLEXES

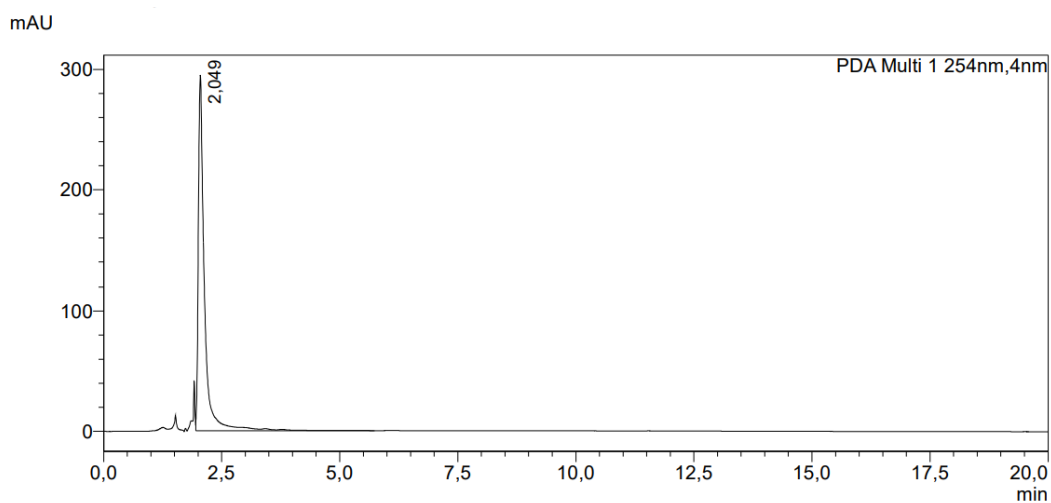

Figure S24. HPLC chromatogram of GW7604-Prop-PtCl<sub>3</sub>.

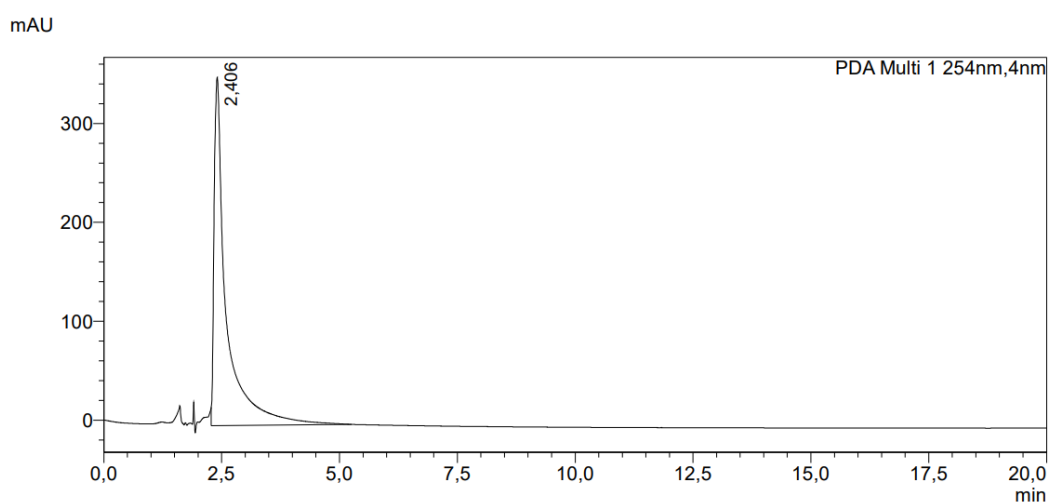

Figure S25. HPLC chromatogram of GW7604-But-PtCl<sub>3</sub>.

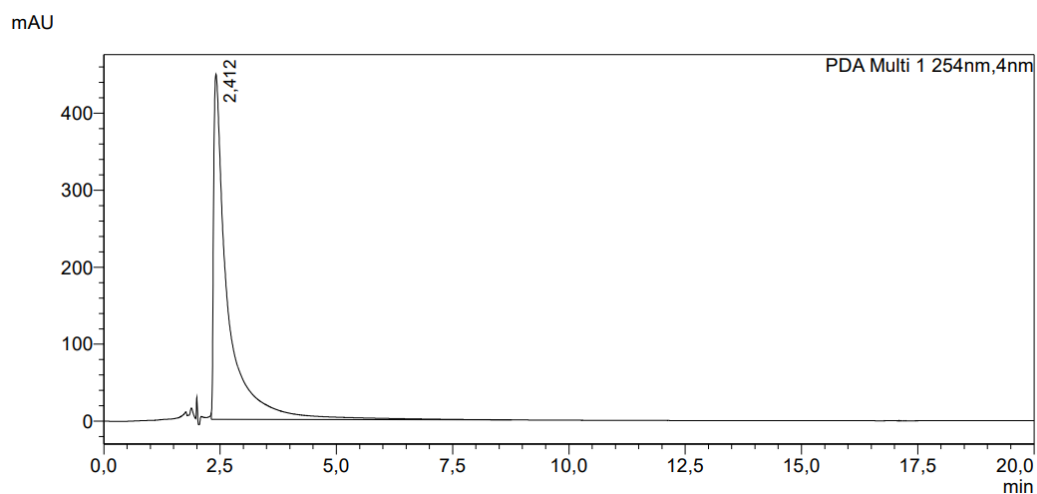

Figure S26. HPLC chromatogram of GW7604-Pent-PtCl<sub>3</sub>.

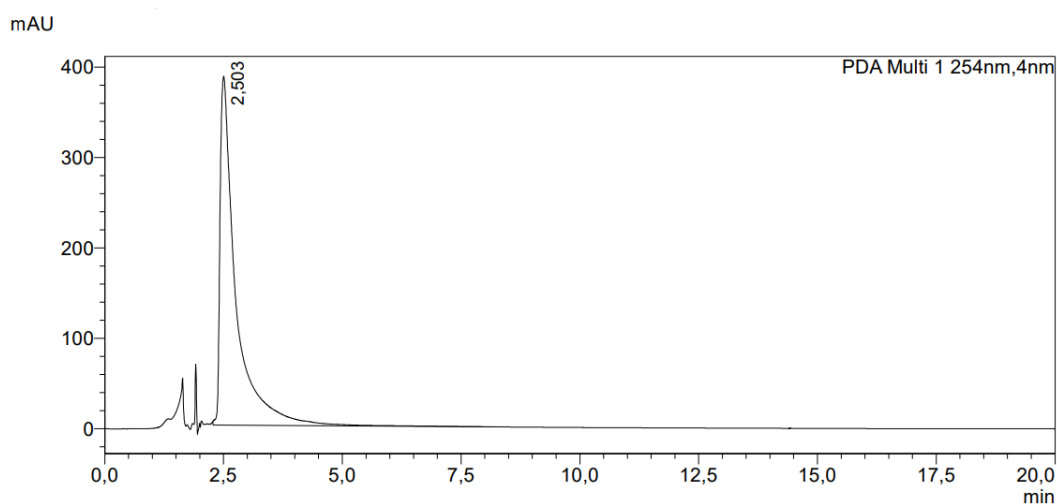

**Figure S27.** HPLC chromatogram of GW7604-Hex-PtCl<sub>3</sub>.

**5. MS SPECTRUM OF THE METHANOLIC EXTRACT FROM DMEM INCUBATED WITH GW7604-PENT-PTCL<sub>3</sub> AND THE CALCULATED ISOTOPIC DISTRIBUTION PATTERN FOR [GW7604-PENT-PT(ALA)(CH<sub>3</sub>OH)]<sup>+</sup>**

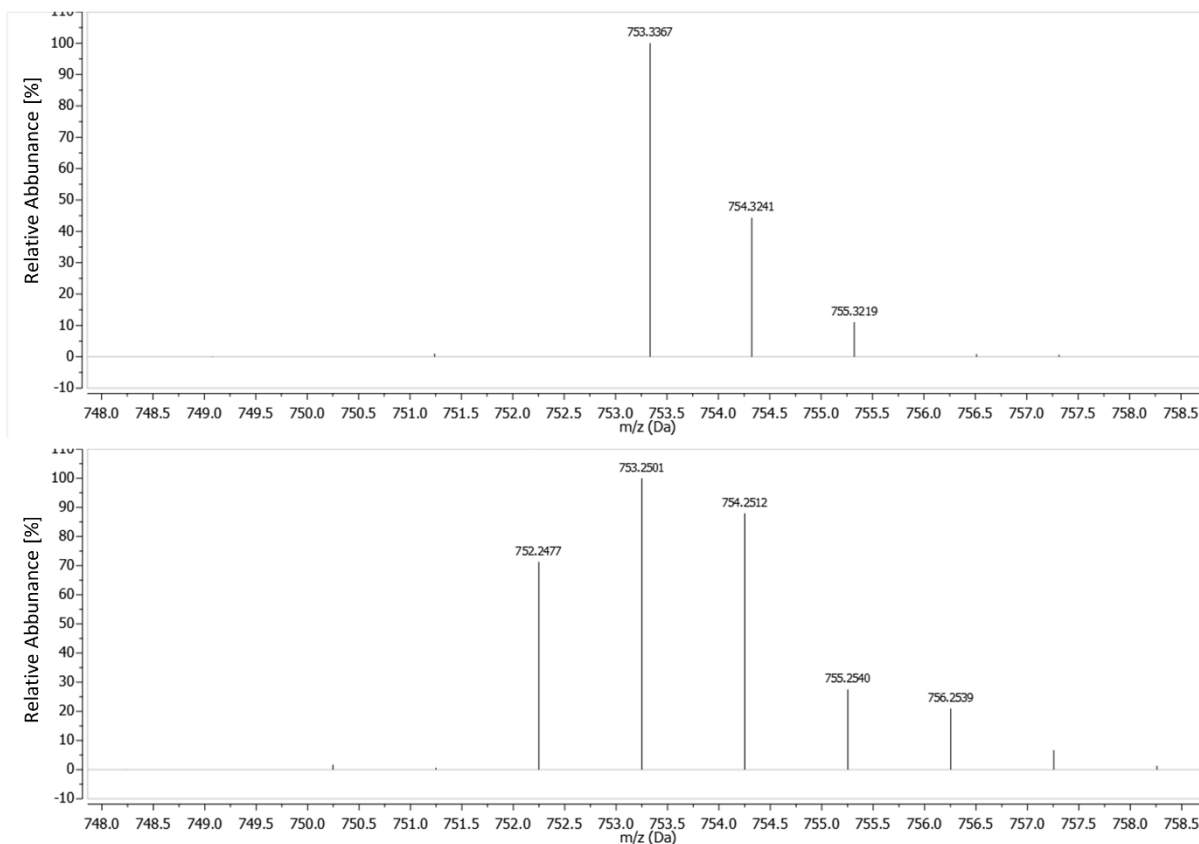

**Figure S28.** Comparison of the found (upper MS spectrum) with the MS spectrum (lower figure) calculated for the supposed adduct [GW7604-Pent-Pt(Ala)(CH<sub>3</sub>OH)]<sup>+</sup>. Calculations were carried out with MestreNova v14.

## 6. ADDITIONAL ESI-HR-MS DATA FROM REACTIVITY STUDIES TOWARDS 5'-GUANOSIN MONOPHOSPHATE

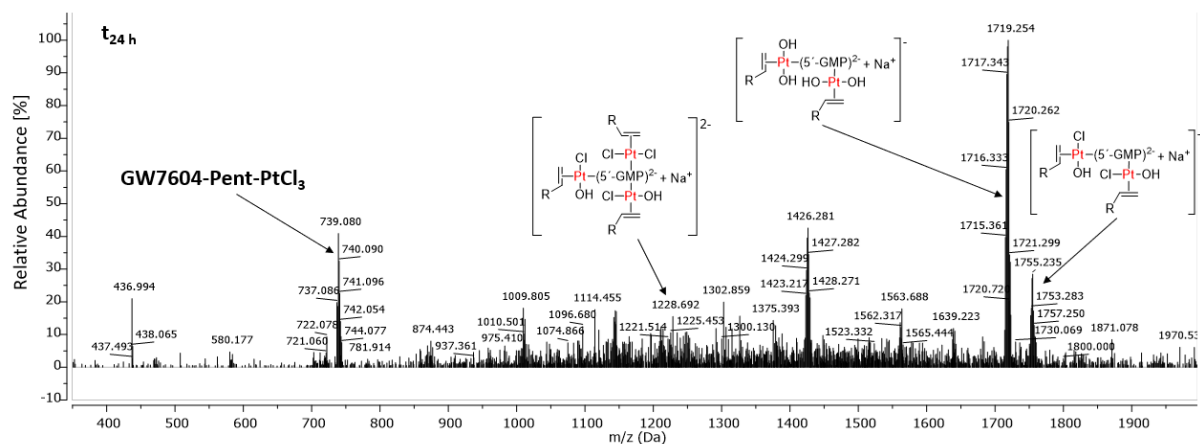

**Figure S29.** ESI-HR-MS spectrum in negative mode obtained from a mixture of **GW7604-Pent-PtCl<sub>3</sub>** in MeOH and 5'-GMP in water (80/20, (v/v)) after 24 h incubation at rt; R-C=C: **GW7604-Pent**.

## 7. ADDITIONAL BIOLOGICAL DATA FOR TSA-201 AND MCF-7 CELLS

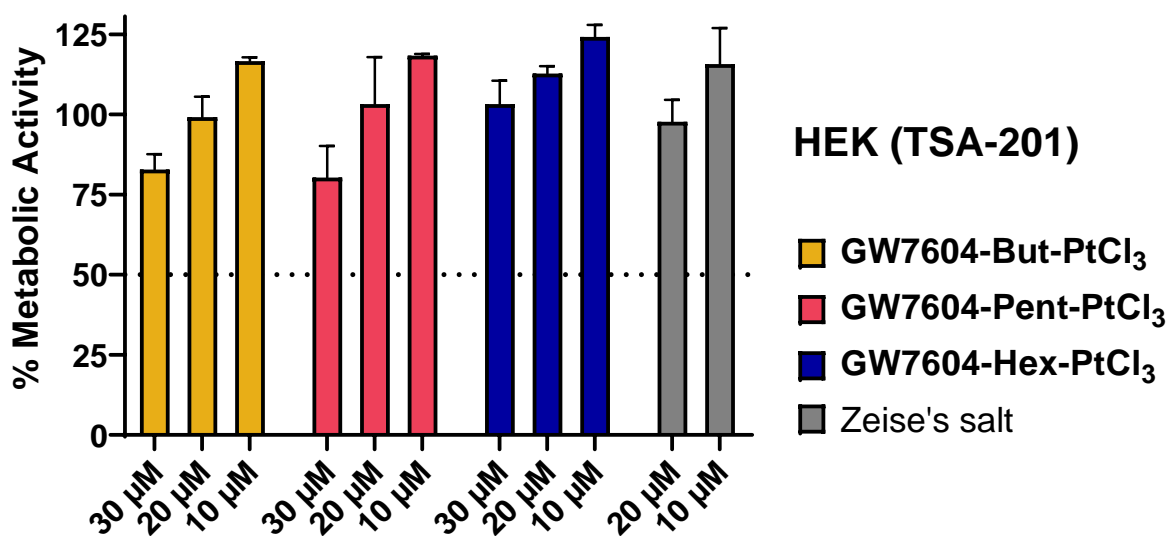

**Figure S30.** Investigation of metabolic activity in non-cancerous HEK (TSA-201) cells. Cells were incubated for 72 h. The reduction of metabolic activity was measured *via* an MTT assay as the mean of 3 independent experiments  $\pm$  SD.



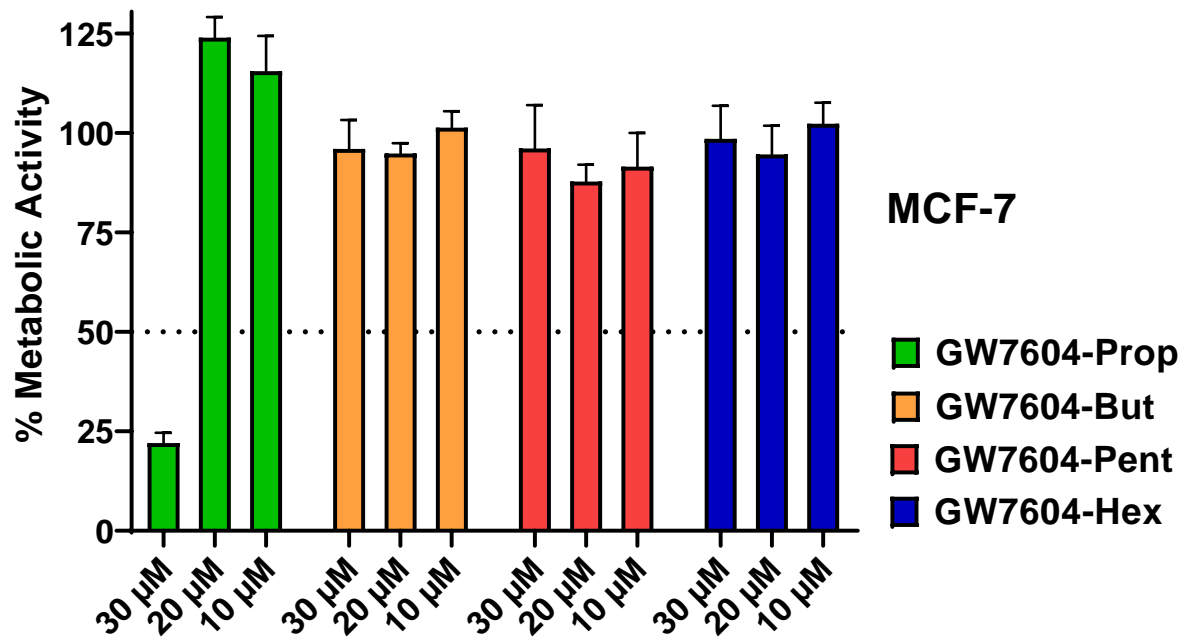

**Figure S31.** Investigation of metabolic activity in MCF-7 cells. Cells were incubated for 72 h. The reduction of metabolic activity was measured *via* an MTT assay as the mean of 3 independent experiments  $\pm$  SD.
